# Supplementary material
Source: publisher site journal article supplement (https://www.dovepress.com/article/532987)
Supplement: Supplementary file 1 [file 532987%20Revised%20Supplementary%20Material_1.doc]

Supplementary Material

Table S1 Primer Sequence

| **Gene** | **Forward primer** | **Reverse Primer** |
| --- | --- | --- |
| Si-METTL3 | CGAAAGAACAGCAGAGCAA | UUGCUCUGCUGUUCUUUCG |
| Mus-CXCL2 | AGTGAACTGCGCTGTCAATG | CGTCACACTCAAGCTCTGC |
| Si-IGF2BP1#1 | GUCCCAAGGAGGAAGUAAA | UUUACUUCCUCCUUGGGAC |
| Si-IGF2BP1#2 | GAGCAAGUGAACACUGAAA | UUUCAGUGUUCACUUGCUC |
| Si-CXCL2#1 | UGAACAAAGGCAAGGCUAA | UUAGCCUUGCCUUUGUUCA |
| Si-CXCL2#2 | GGGCUGUUGUGGCCAGUGA | AAGCUCUGGAUGUUCUUGA |
| Si-CXCL2#3 | UCAAGAACAUCCAGAGCUU | AAGCUCUGGAUGUUCUUGA |
| Mus-YTHDH1 | GCAGTTAAGACCGTGGGTTC | ACATTTGTCCCACCATTGCC |
| Mus-YTHDH2 | TTTCAGTGTCAACGGCAGTG | AGACGAATGTGTCGCAGTTG |
| Mus-YTHDH3 | GGTCAGTGGTAAAGGCTCCA | CTGTTGAGGCAGTTGGCTTT |
| Mus-IGF2BP1 | CACAAGGAGGCAAAGGACAC | TCCTGCTCCACCTTCTTCAG |
| Mus-IGF2BP2 | GCCCATTCCCACATCATCAC | ACCTTCTGCTCGAGCAATCT |
| Mus-IGF2BP3 | TCTGTTTATTCCCGCCCTGT | TCGGCTGGAGCGATCTTAAT |

1. **Figure S1. ATO and METTL3 2D ligand interaction maps. (Related to Figure 4C)**

**
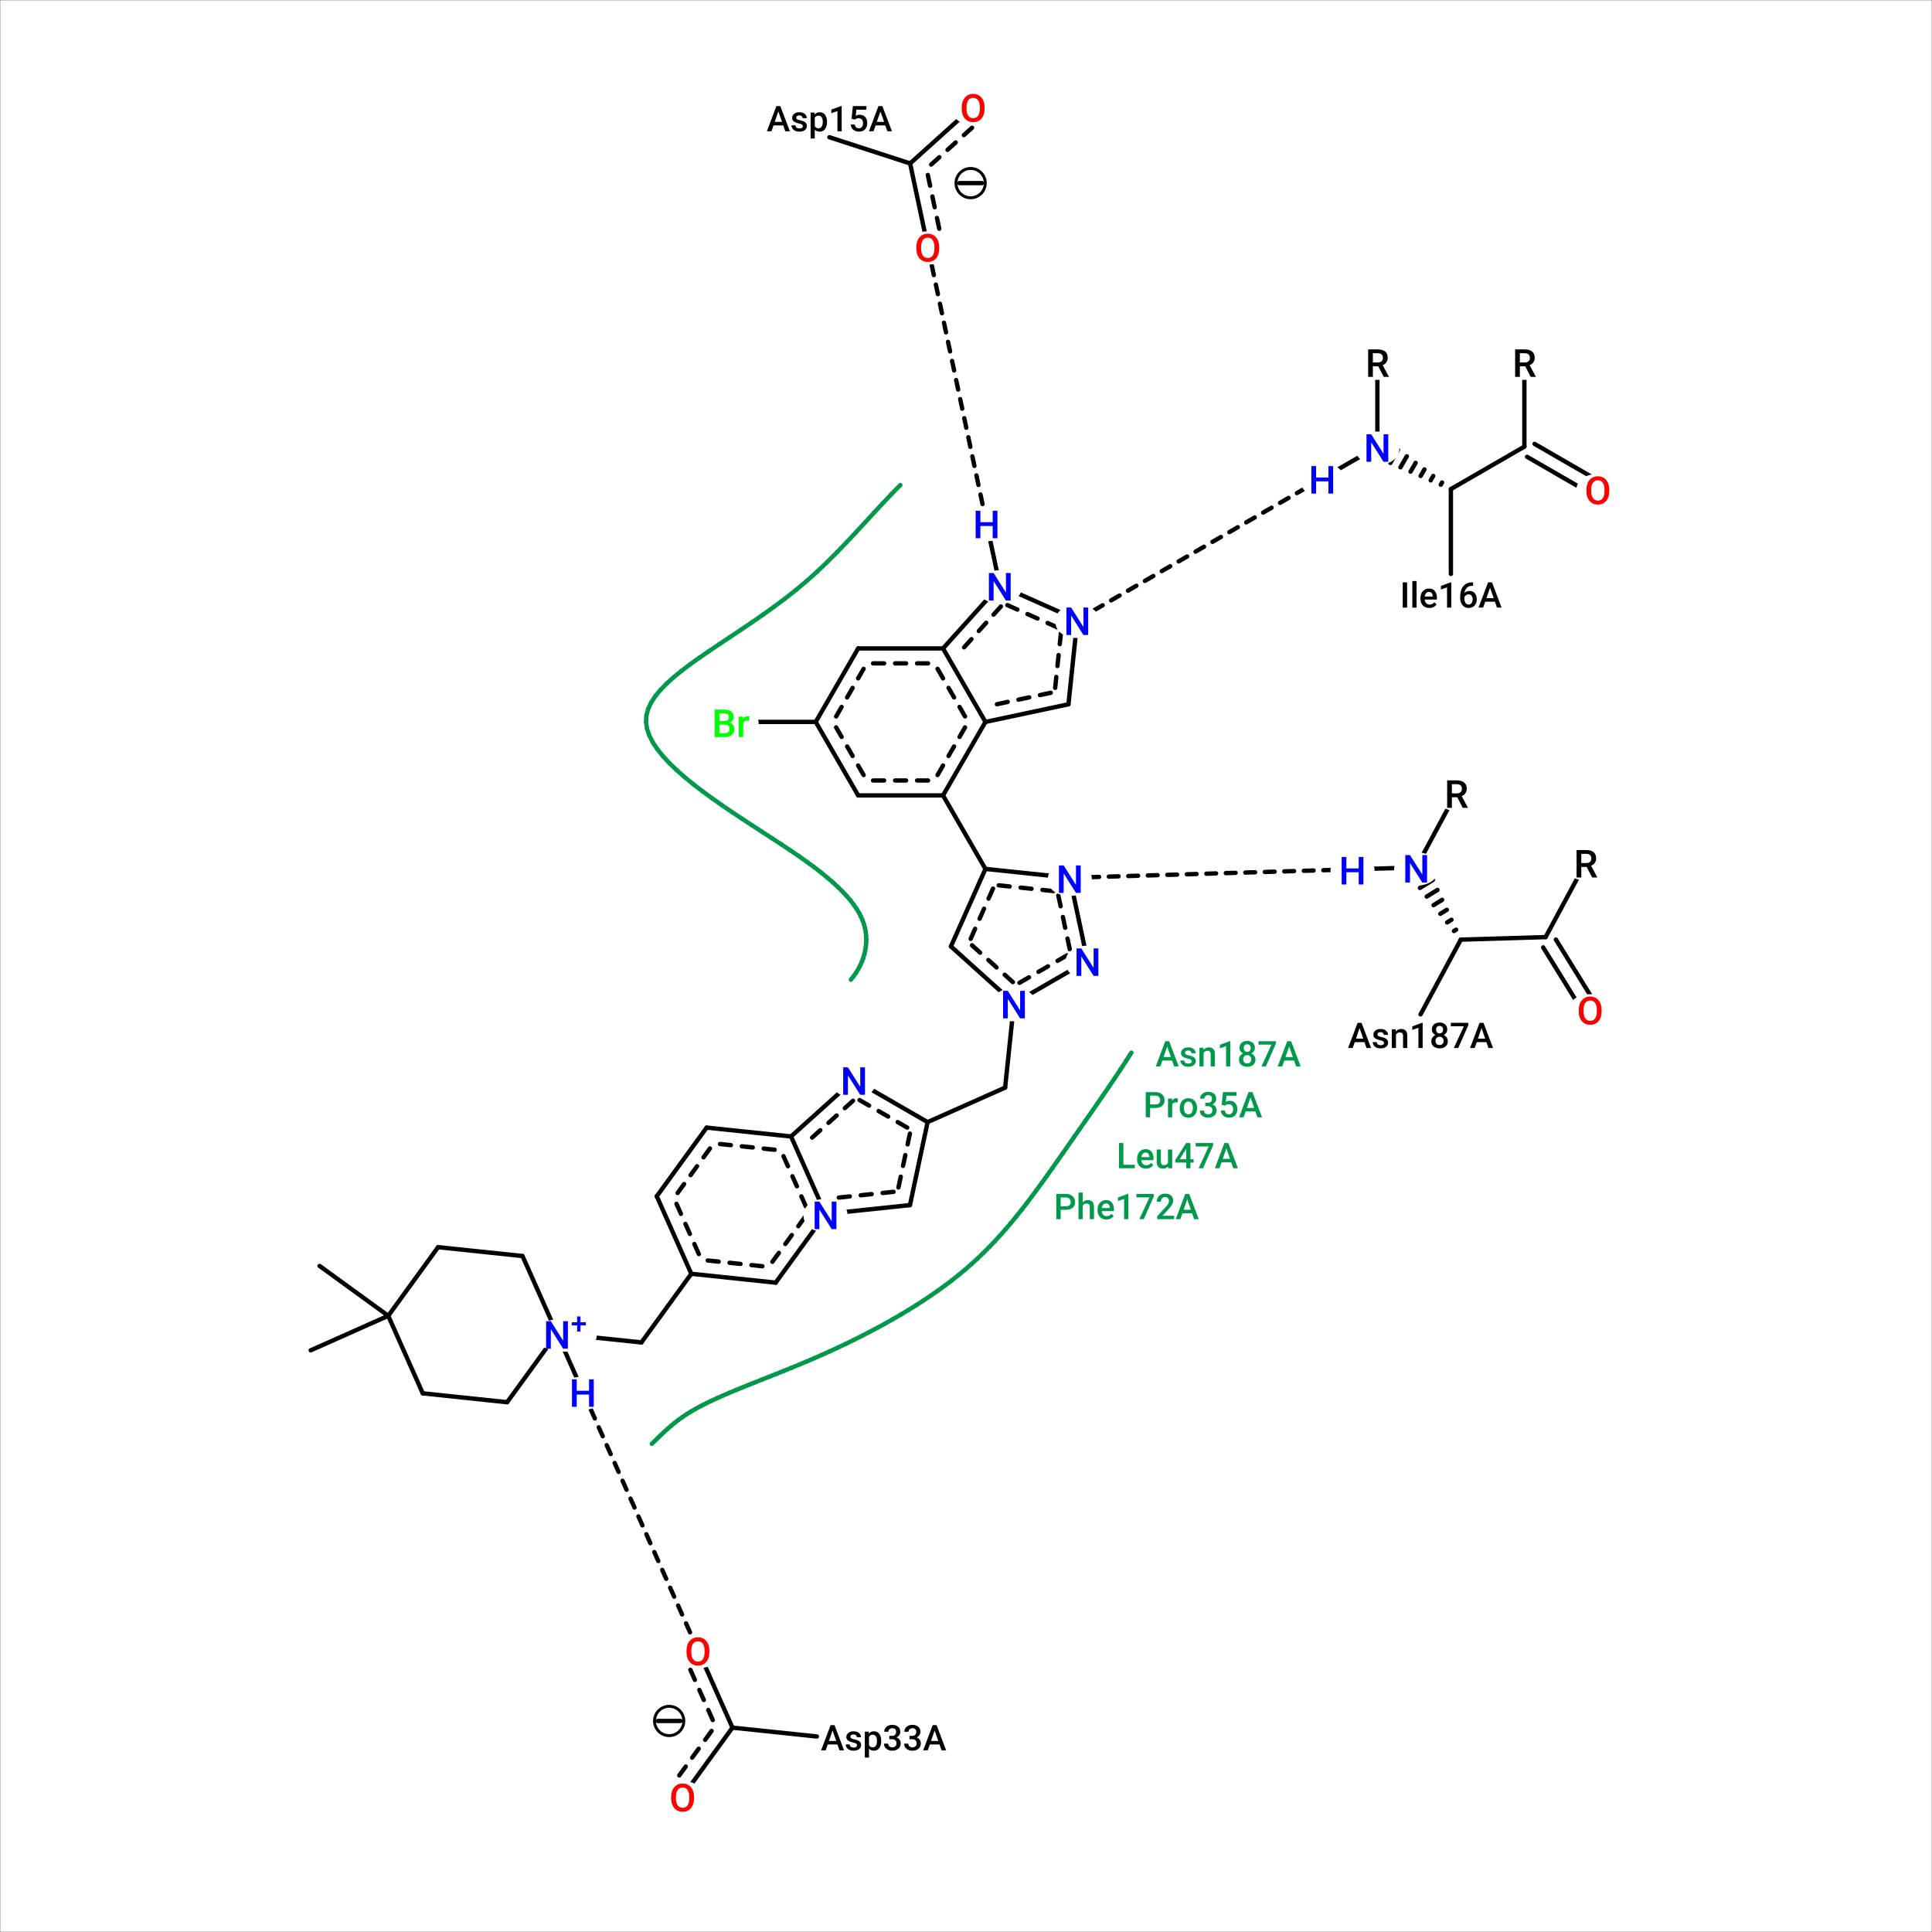
**

1. **Figure S2. METTL3/IGF2BP1 axis mediates CXCL2 mRNA stability through m6A modification in the pathological progression of SICM. (Related to Figure 6)**


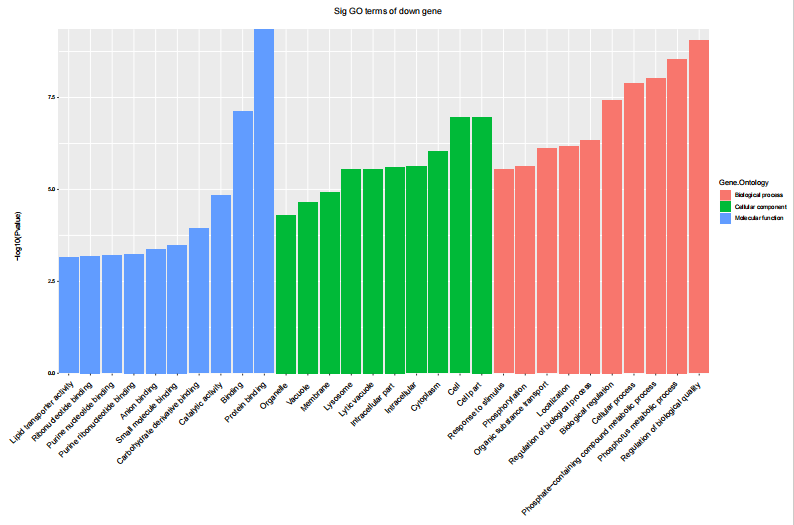


GO analysis revealed that the major biological processes involved phosphorus metabolism processes, biomass regulation, and positive regulation of macromolecular biosynthesis processes. In addition, cellular components such as the cytoplasm, lysosomes, and perinuclear space were significantly affected by the differentially expressed genes. The main molecular functions included protein binding, catalytic activity, cell adhesion molecule binding, and growth factor binding.
